# Supplementary material for: Isolation of the Flavonoid from Bamboo Residues and Its Application as Metal Ion Sensor in Vitro
Source: PubMed Central journal article supplement (PMC6780781; doi:10.3390/polym11091377), 2019-08-22
Supplement: polymers-11-01377-s001.pdf [file polymers-11-01377-s001.pdf]

## Supplementary Materials

**Figure S1.** HPLC chromatogram of the BRF detected at 280 nm.

**Figure S2.** LCMS profiles of five standard compounds. From (a) to (e) are isoorientin, isovitexin, pinosylvin, tricin, isorhamnetin.

**Table S1.** Main flavonoids compounds in BRF identified using LCMS profiling.

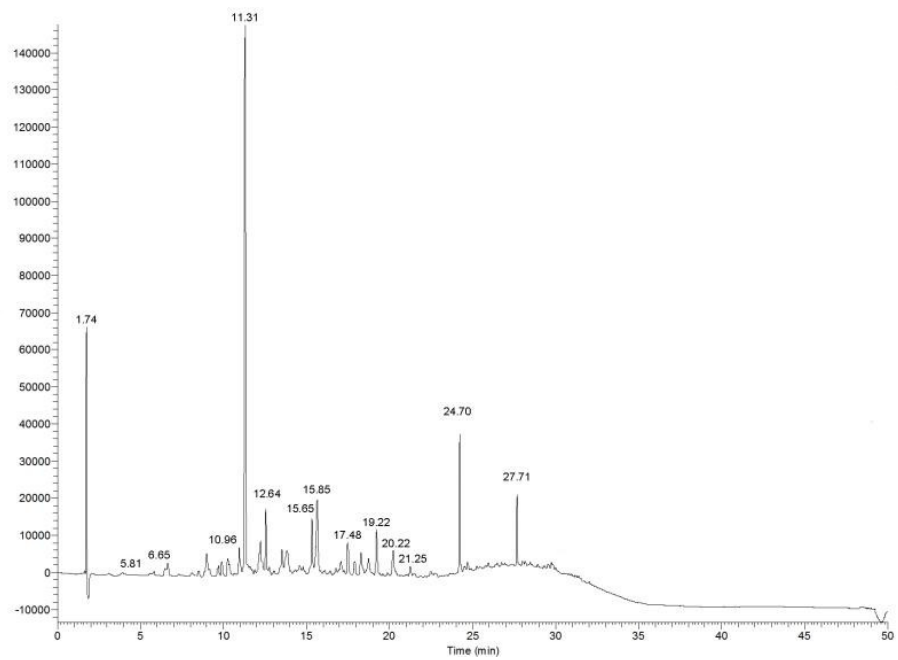

Fig. S1.

D:\DATA\...SAM\_20190804102057

08/04/19 10:22:09

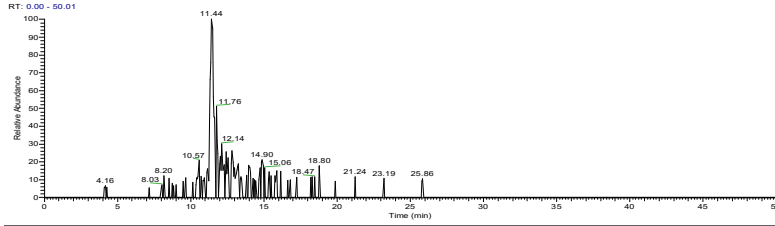

N: 1.21E5  
m/z: 449.10575-449.11025  
F: FTMS - c ESI Full ms  
[150.0000-2000.0000]  
MS  
SAM\_20190804102057

SAM 20190804102057 #4750 RT: 11.49 AV: 1 SB: 197 6.66-11.26, 15.43-21.48 N: 1.13E5  
T: FTMS - c ESI Full ms [150.0000-2000.0000]

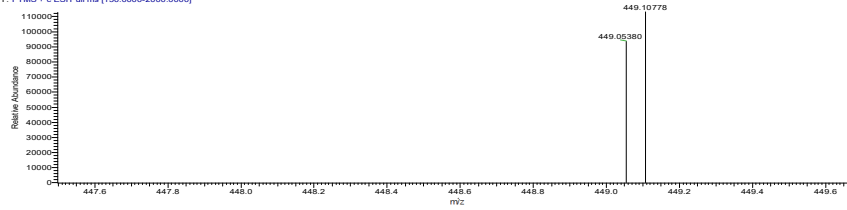

a

D:\DATA\...SAM\_20190804102057

08/04/19 10:22:09

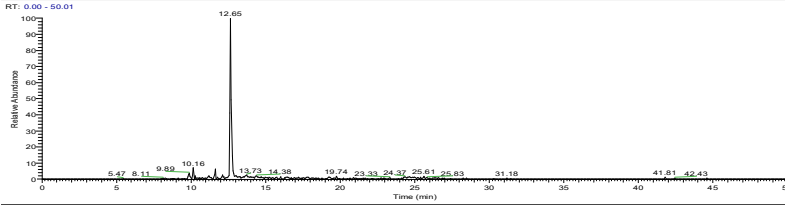

N: 3.32E6  
m/z: 431.09564-431.10018  
F: FTMS - c ESI Full ms  
[100.0000-1500.0000]  
MS  
SAM\_20190804102057

SAM 20190804102057 #173 RT: 12.85 AV: 1 SB: 197 6.66-11.26, 15.43-21.48 N: 3.30E6  
T: FTMS - c ESI Full ms [100.0000-1500.0000]

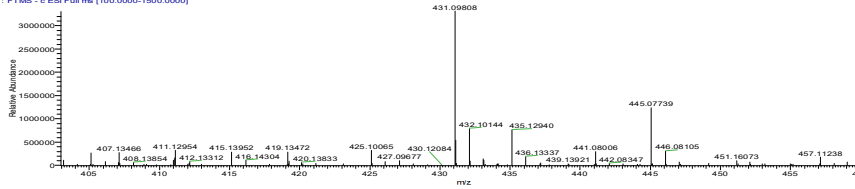

b

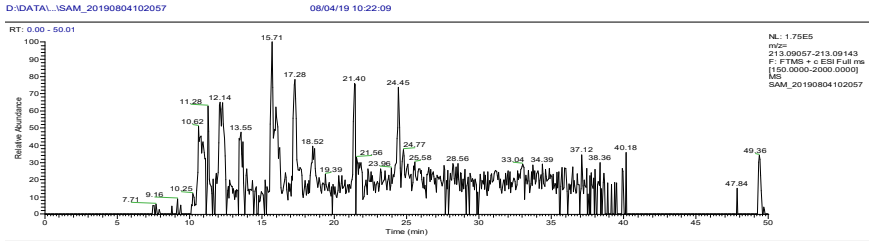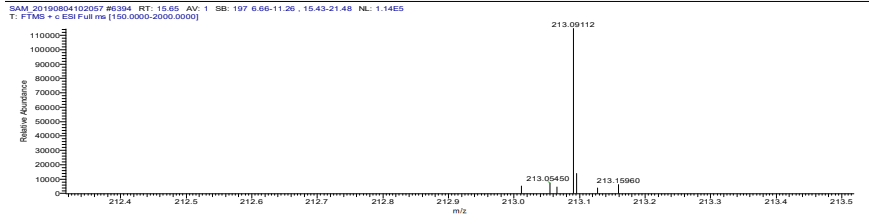

c

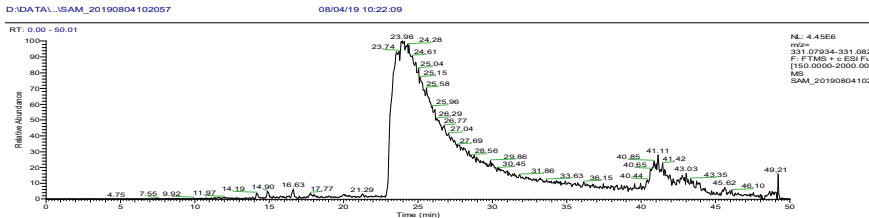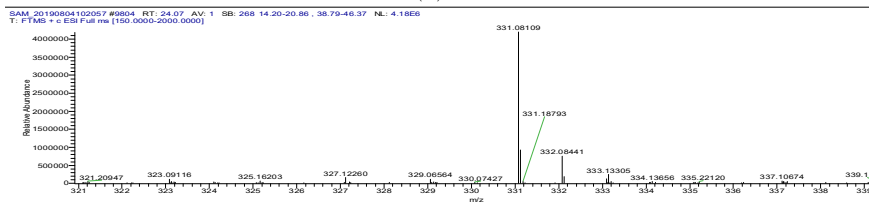

d

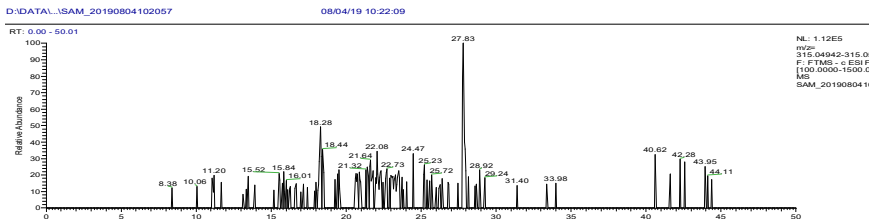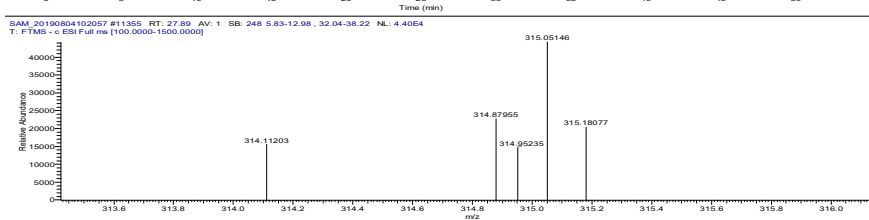

e

Fig. S2.

**Table S1.**

| <b>Sample</b> | <b>Compounds</b> | <b>Retention Time (RT)</b> | <b>Molecular weight</b> |
|---------------|------------------|----------------------------|-------------------------|
| BRF           | isorientin       | 11.31                      | 448.376                 |
|               | isovitexin       | 12.64                      | 432.377                 |
|               | pinosylvin       | 15.65                      | 212.24                  |
|               | tricin           | 24.7                       | 330.29                  |
|               | isorhamnetin     | 27.71                      | 316.27                  |
| standards     | isorientin       | 11.49                      | 448.108                 |
|               | isovitexin       | 12.65                      | 432.098                 |
|               | pinosylvin       | 15.71                      | 212.091                 |
|               | tricin           | 24.07                      | 330.081                 |
|               | isorhamnetin     | 27.89                      | 316.051                 |
